# Supplementary material for: DGKA Mediates Resistance to PD-1 Blockade
Source: Oxford University Press journal article supplement (doi:10.1158/2326-6066.cir-20-0216), 2021-02-19
Supplement: 23266066cir200216-sup-239592_2_supp_6922843_qmlmj6.xlsx [file 23266066cir200216-sup-239592_2_supp_6922843_qmlmj6.xlsx]

## Sheet: Fold Change
Fold change of differential express genes
Gene_ID	Naïve	Effector	Early Stage	Late Stage
Ccr6	1.45274	-0.132068	-0.660338	-0.660338
Bach2	1.4968	-0.44985	-0.45574	-0.59121
Il7r	1.49733	-0.520011	-0.417954	-0.559369
Ccr7	1.49787	-0.571434	-0.444194	-0.482238
Lef1	1.47847	-0.557066	-0.659855	-0.261545
Sell	1.46412	-0.473888	-0.761099	-0.229136
Il4ra	1.45245	-0.774537	-0.513144	-0.164774
Tcf7	1.37768	-0.777283	-0.69869	0.098293
Dgka	-0.0025212	-0.73652	-0.675573	1.41461
Dgkz	0.649591	-0.824836	-0.882512	1.05776
Cxcr4	0.65505	-0.917064	-0.789748	1.05176
Cxcr5	0.434397	-0.973508	-0.657337	1.19645
Ccl5	-0.351157	1.00732	0.579312	-1.23547
Ccl12	-0.69023	1.20028	0.435205	-0.945255
Ccl4	-0.890081	0.925358	0.804203	-0.83948
Gzmb	-0.873466	1.04738	0.663023	-0.836934
Il12rb2	-0.865542	1.08691	0.612144	-0.833512
Gzmb	-0.880131	1.04662	0.66378	-0.83027
Ccl3	-0.781257	1.34958	0.166822	-0.735146
Ifng	-1.03097	0.980668	0.72305	-0.672747
Il2	-1.16723	0.617071	1.01854	-0.468379
Tnf	-1.27348	0.815059	0.780961	-0.322542
Tnfrsf18	-1.33673	0.899721	0.611046	-0.174042
Egr2	-0.942646	-0.762701	0.658249	1.0471
Icos	-1.26181	-0.177245	0.306615	1.13244
Runx1	0.2773	-1.06494	-0.466073	1.25371
Cd160	-0.933696	-0.61424	0.248198	1.29974
Rxra	0.0394171	-1.10065	-0.251663	1.31289
Stat3	-0.745945	-0.711295	0.0668606	1.39038
Ctla4	-0.980161	-0.199666	-0.217373	1.3972
Irf2	-0.0318877	-0.826035	-0.558114	1.41604
Tbx21	-0.708335	-0.702117	-0.00562076	1.41607
Ikzf2	-0.543947	-0.821085	-0.0585259	1.42356
Atf3	-0.813425	-0.49224	-0.135729	1.44139
Runx2	-0.663782	-0.683018	-0.096647	1.44345
Nr4a1	-0.681737	-0.63072	-0.142569	1.45503
Havcr2	-0.646395	-0.630936	-0.188469	1.4658
Irf1	-0.380292	-0.783822	-0.302087	1.4662
Rara	-0.532428	-0.707791	-0.230326	1.47054
Fasl	-0.677192	-0.574506	-0.219131	1.47083
Cd244a	-0.235582	-0.661836	-0.576912	1.47433
Pdcd1	-0.712934	-0.471876	-0.292798	1.47761
Lag3	-0.677466	-0.456654	-0.352014	1.48613
Runx3	-0.3968	-0.64071	-0.45434	1.49185
Ctcf	-0.355967	-0.534564	-0.601397	1.49193
Btla	-0.626895	-0.432756	-0.434097	1.49375
Prdm1	-0.577432	-0.522219	-0.396019	1.49567
Hoxb4	-0.43127	-0.462353	-0.602225	1.49585
Nfatc1	-0.436725	-0.595894	-0.463749	1.49637
Tox	-0.438752	-0.531108	-0.528753	1.49861
Eomes	-0.477568	-0.551205	-0.470225	1.499
Tigit	-0.529322	-0.517121	-0.45271	1.49915
Il10	-0.509851	-0.480151	-0.509851	1.49985

## Sheet: Differential Gene Expression
Gene expression in OT-1 T cells (FPKM)
Gene_ID	Naïve	Effector	Early Stage	Late Stage
Ccr6	0.8	0.2	0	0
Bach2	17.82	4.6	4.56	3.64
Il7r	58.65	14.57	16.8	13.71
Ccr7	258.27	32.54	46.42	42.27
Lef1	48.98	7.79	5.71	13.77
Sell	135.6	32.9	17.68	45.87
Il4ra	41.868	29.77	31.19	33.0825
Tcf7	99.204	12.01	15.19	47.4375
Dgka	42.57	25.83	27.22	74.89
Dgkz	49.74	39.77	39.38	52.5
Cxcr4	61.674	8.33	12.65	75.135
Cxcr5	5.49	0.28	1.45	8.31
Ccl5	193.88	487.63	395.08	2.66
Ccl12	0.46	3.87	2.49	0
Ccl4	3.67	242.97	227	10.34
Gzmb	44.835	2167.21	1742.53	85.2
Il12rb2	5.28	60.14	46.8	6.18
Gzmb	29.89	2167.21	1742.53	85.2
Ccl3	1.84	720.87	321.76	17.4
Ifng	5.25	268.79	235.04	52.18
Il2	0	1.2	1.47	0.47
Tnf	13.944	147.47	145.29	74.74
Tnfrsf18	30.33	173.19	154.75	104.6
Egr2	0.96	1.83	8.7	10.58
Icos	5.472	22.44	30.01	42.93
Runx1	10.59	0.28	4.88	18.09
Cd160	10.46	17.42	36.21	59.12
Rxra	1.88	0	1.4	3.98
Stat3	43.46	49.28	179.98	402.28
Ctla4	1.6	69.48	67.94	208.36
Irf2	13.88	1.49	5.67	36.47
Tbx21	7.04	7.17	21.73	51.45
Ikzf2	3.13	1.52	5.95	14.56
Atf3	0.67	12.49	25.61	83.65
Runx2	3.52	2.69	27.99	94.44
Nr4a1	13.95	18.05	57.28	185.67
Havcr2	1	1.9	27.66	123.97
Irf1	70.8	36.59	77.43	227.34
Rara	7.65	4.26	13.49	46.37
Fasl	3.64	6.7	17.29	67.65
Cd244a	3.36	0.75	1.27	13.83
Pdcd1	1.22	23.7	40.4	205.5
Lag3	1.37	31.63	45.97	297.87
Runx3	14.79	5.21	12.53	88.97
Ctcf	17.46	12.73	10.96	66.4
Btla	4.7625	6.21	6.2	20.574
Prdm1	0.97	1.81	3.73	32.51
Hoxb4	0.11	0.09	0	1.35
Nfatc1	12.23	5.81	11.14	90.2
Tox	4.41	0.88	0.97	78.46
Eomes	4.04	0.43	4.4	100.94
Tigit	1.82	5.08	22.29	543.81
Il10	0	0.3	0	20.3
